# Supplementary material for: Synthesis, structure and photoluminescence properties of a novel color-tunable Si1.92Al0.08O1.08N1.92:Eu2+,Tb3+,Sm2+phosphor for ultraviolet white light-emitting diodes
Source: Royal Society of Chemistry journal article supplement (doi:10.1039/c5ra16603a), 2015-01-01
Supplement: c5ra16603a1.pdf [file c5ra16603a1.pdf]

**Table S1 Atomic coordinates and site occupancy fraction (SOF) for  $\text{Si}_{1.92}\text{Al}_{0.08}\text{O}_{1.08}\text{N}_{1.92}$**

| Atom  | x       | y       | z       | SOF  |
|-------|---------|---------|---------|------|
| Si/Al | 0.17610 | 0.15331 | 0.25670 | 1    |
| N1    | 0.21981 | 0.13011 | 0.65460 | 0.72 |
| O1    | 0.20779 | 0.14550 | 0.55314 | 0.28 |
| O2    | 0.00000 | 0.20897 | 0.23000 | 1    |

**Table S2 Comparison of the CIE chromaticity coordinates for  $\text{Si}_{1.92}\text{Al}_{0.08}\text{O}_{1.08}\text{N}_{1.92}$ : x% $\text{Eu}^{2+}$ , y% $\text{Tb}^{3+}$ , z% $\text{Sm}^{2+}$ .**

| Sample no. | x    | y    | z      | CIE coordinates (x, y) |
|------------|------|------|--------|------------------------|
| 1          | 0.18 | 0    | 0      | (0.1716, 0.1508)       |
| 2          | 0.18 | 0.1  | 0      | (0.19, 0.1872)         |
| 3          | 0.18 | 0.55 | 0      | (0.2142, 0.2492)       |
| 4          | 0.18 | 1    | 0      | (0.2377, 0.2991)       |
| 5          | 0    | 1    | 0      | (0.3607, 0.5631)       |
| 6          | 0    | 0    | 0.03   | (0.7076, 0.2923)       |
| 7          | 0.18 | 1    | 0.0045 | (0.2574, 0.2658)       |
| 8          | 0.18 | 1    | 0.018  | (0.3165, 0.2348)       |
| 9          | 0.18 | 1    | 0.03   | (0.3573, 0.2231)       |
